# Supplementary material for: Impact of Seasonality on Physical Activity: A Systematic Review
Source: MDPI journal article supplement (doi:10.3390/ijerph19010002), 2021-12-21
Supplement: s1 [file s1]

**Table S4.** Methodology quality assessment according to JIB checklist for cross-sectional studies.

| Author (year)               | 1 | 2 | 3 | 4 | 5 | 6 | 7 | 8 | %   |
|-----------------------------|---|---|---|---|---|---|---|---|-----|
| Cepeda et al. (2018)        | Y | Y | Y | Y | Y | Y | Y | Y | 100 |
| Collins et al. (2015)       | Y | Y | Y | Y | N | N | Y | Y | 75  |
| Dédélé et al (2019)         | Y | Y | Y | Y | Y | Y | Y | Y | 100 |
| Hoaas et al. (2019)         | Y | Y | Y | Y | Y | Y | Y | Y | 100 |
| Klompstra et al. (2019)     | Y | Y | Y | Y | N | N | Y | Y | 75  |
| Nakashima et al.<br>(2019)  | Y | Y | Y | Y | N | N | Y | Y | 75  |
| Wesolowska et al.<br>(2018) | N | N | Y | Y | N | N | Y | Y | 50  |

Y: YES, N: NO, %: PERCENTAGE
