# Supplementary material for: Impact of Seasonality on Physical Activity: A Systematic Review
Source: MDPI journal article supplement (doi:10.3390/ijerph19010002), 2021-12-21
Supplement: s1 [file s1]

Table S5. Methodology quality assessment according to JBI Checklist for Randomized Controlled Trials

| Author (year)           | 1 | 2 | 3 | 4 | 5 | 6 | 7 | 8 | 9 | 10 | 11 | 12 | 13 | %     |
|-------------------------|---|---|---|---|---|---|---|---|---|----|----|----|----|-------|
| Carr et al. (2016)      | Y | Y | Y | N | N | Y | Y | Y | Y | Y  | Y  | Y  | Y  | 84.62 |
| Shoemaker et al. (2016) | Y | U | U | N | Y | Y | Y | U | U | Y  | Y  | Y  | Y  | 61.54 |
| Wan et al. (2017)       | Y | Y | N | N | Y | Y | Y | U | Y | Y  | Y  | Y  | Y  | 76.93 |

Y: YES, N: NO, U: UNCLEAR, %: PERCENTAGE
