# Supplementary material for: Impact of Seasonality on Physical Activity: A Systematic Review
Source: MDPI journal article supplement (doi:10.3390/ijerph19010002), 2021-12-21
Supplement: s1 [file s1]

**Table S3.** Methodology quality assessment according to JIB checklist for cohort studies.

| <b>Author (year)</b>      | <b>1</b> | <b>2</b> | <b>3</b> | <b>4</b> | <b>5</b> | <b>6</b> | <b>7</b> | <b>8</b> | <b>9</b> | <b>10</b> | <b>11</b> | <b>%</b> |
|---------------------------|----------|----------|----------|----------|----------|----------|----------|----------|----------|-----------|-----------|----------|
| Akande et al. (2019)      | Y        | Y        | Y        | Y        | U        | Y        | Y        | Y        | N        | N         | Y         | 72.7     |
| Arnardottir et al. (2017) | Y        | Y        | Y        | N        | N        | Y        | Y        | Y        | N        | N         | Y         | 63.6     |
| Furlanetto et al. (2017)  | Y        | Y        | Y        | N        | N        | Y        | Y        | Y        | N        | N         | Y         | 63.6     |
| Kim et al. (2016)         | Y        | Y        | Y        | N        | N        | Y        | Y        | Y        | N        | N         | y         | 63.6     |
| Kimura et al. (2015)      | Y        | Y        | U        | N        | N        | Y        | U        | U        | N        | N         | Y         | 36.36    |
| Kong et al. (2020)        | Y        | Y        | Y        | Y        | Y        | Y        | Y        | Y        | N        | N         | Y         | 81.81    |
| Nioi et al. (2017)        | Y        | Y        | Y        | U        | N        | Y        | Y        | Y        | N        | N         | Y         | 63.6     |
| Sayegh et al. (2016)      | Y        | Y        | Y        | N        | N        | Y        | Y        | Y        | N        | N         | Y         | 63.6     |
| Urbański et al. (2020)    | Y        | Y        | Y        | N        | N        | Y        | Y        | Y        | N        | N         | Y         | 63.6     |

Y: YES, N: NO, U: UNCLEAR, %: PERCENTAGE
