# Supplementary material for: Impact of Seasonality on Physical Activity: A Systematic Review
Source: MDPI journal article supplement (doi:10.3390/ijerph19010002), 2021-12-21
Supplement: s1 [file s1]

**Table S2.** Systematic research.

|                         |                                                                                                                                                                                                                                                                                                                                                                                                                                                                          |
|-------------------------|--------------------------------------------------------------------------------------------------------------------------------------------------------------------------------------------------------------------------------------------------------------------------------------------------------------------------------------------------------------------------------------------------------------------------------------------------------------------------|
| MEDLINE                 | (((((motor activity[MeSH Terms]) OR physical activity[Title/Abstract]) OR exercise[MeSH Terms]) OR training[MeSH Terms]) AND seasons[MeSH Terms]) AND season*[Title/Abstract]                                                                                                                                                                                                                                                                                            |
|                         | physical activity[Title/Abstract]) AND season*[Title/Abstract]                                                                                                                                                                                                                                                                                                                                                                                                           |
| PEDRO                   | Physical activity AND Season* (or Physical activity, Season*)                                                                                                                                                                                                                                                                                                                                                                                                            |
|                         | Exercise AND Season* (or Exercise, Season*)                                                                                                                                                                                                                                                                                                                                                                                                                              |
| EMBASE<br>(PICO search) | ('motor activity'/exp OR 'physical activity':ti,ab,kw OR 'exercise'/exp OR exercise:ti,ab,kw) AND 'season'/exp AND season*:ti,ab,kw NOT sport*:ti,ab,kw NOT injur*:ti,ab,kw NOT athlete*:ti,ab,kw NOT hormon*:ti,ab,kw NOT vaccin*:ti,ab,kw NOT player*:ti,ab,kw NOT elite:ti,ab,kw NOT soccer:ti,ab,kw NOT 'vitamin d':ti,ab,kw NOT serum:ti,ab,kw NOT immune:ti,ab,kw NOT allergy:ti,ab,kw NOT influenza:ti,ab,kw NOT virus:ti,ab,kw AND [2015-2020]/py AND 'human'/de |
| COCHRANE                | (Physical activity):ti,ab,kw AND (Season*):ti,ab,kw                                                                                                                                                                                                                                                                                                                                                                                                                      |
