# Supplementary material for: Impact of Seasonality on Physical Activity: A Systematic Review
Source: Int J Environ Res Public Health. 2021 Dec 21;19(1):2. doi: 10.3390/ijerph19010002 (PMC8751121; doi:10.3390/ijerph19010002)
Supplement: Supplementary file 1 [file ijerph-19-00002-s001.zip]

Archive with 5 entries (5 files):
- Table S1. PRISMA_2020_checklist.pdf
- Table S2. Systematic research.pdf
- Table S3. Methodology quality assessment according to JIB cohort studies.pdf
- Table S4. Methodology quality assessment according to JIB cross-sectional.pdf
- Table S5. Methodology quality assessment according to JIB checklist for randomized controlled trial.pdf
